# Supplementary material for: Cytotoxicity, cellular localisation and biomolecular interaction of non-covalent metallo-intercalators with appended sex hormone steroid vectors
Source: Royal Society of Chemistry journal article supplement (doi:10.1039/b912711a), 2009-01-01
Supplement: b912711a.pdf [file b912711a.pdf]

## Supplementary information

### 1. Spectroscopy of Complexes:

#### 1.1. 1

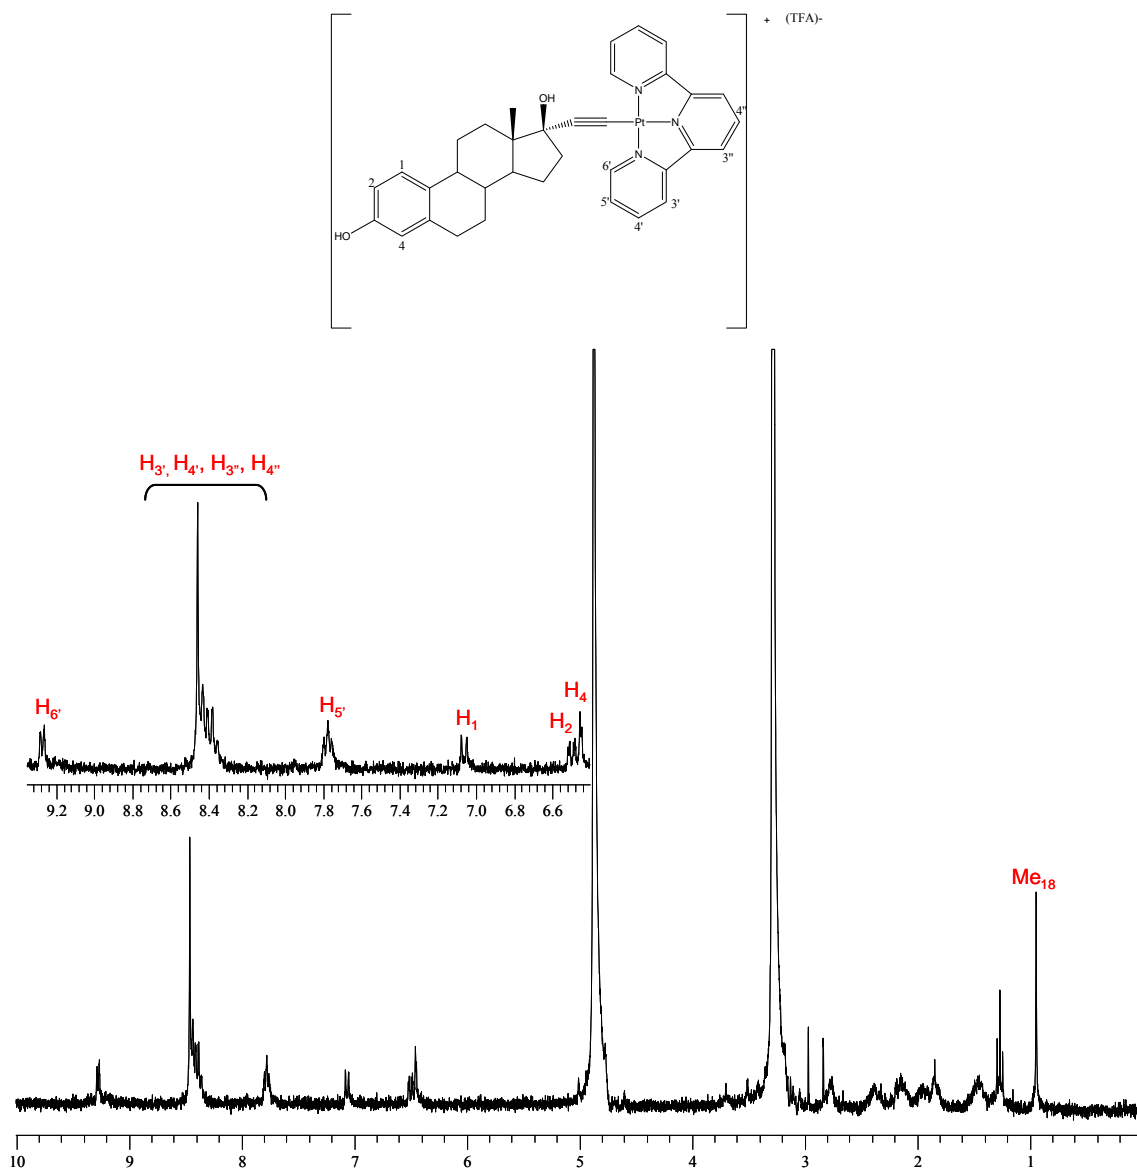

Figure 1.1.1. <sup>1</sup>H-NMR of **1** in a mixture of deuterated water:acetonitrile (1:1).

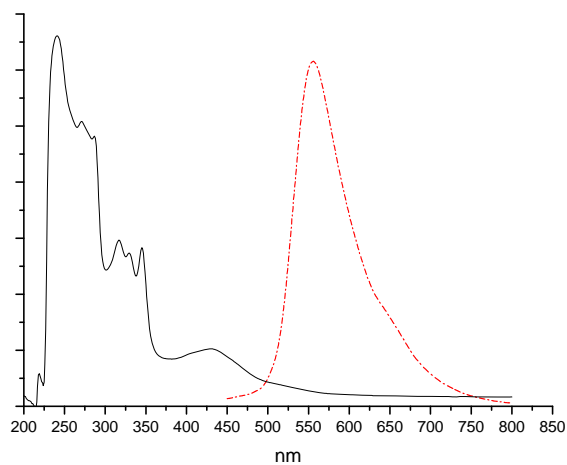

Figure 1.1.2. UV/Vis and Emission spectra of **1** (25  $\mu$ M) in dichloromethane.  $\lambda_{\text{exc}}=425\text{nm}$ .

## 1.2. 2

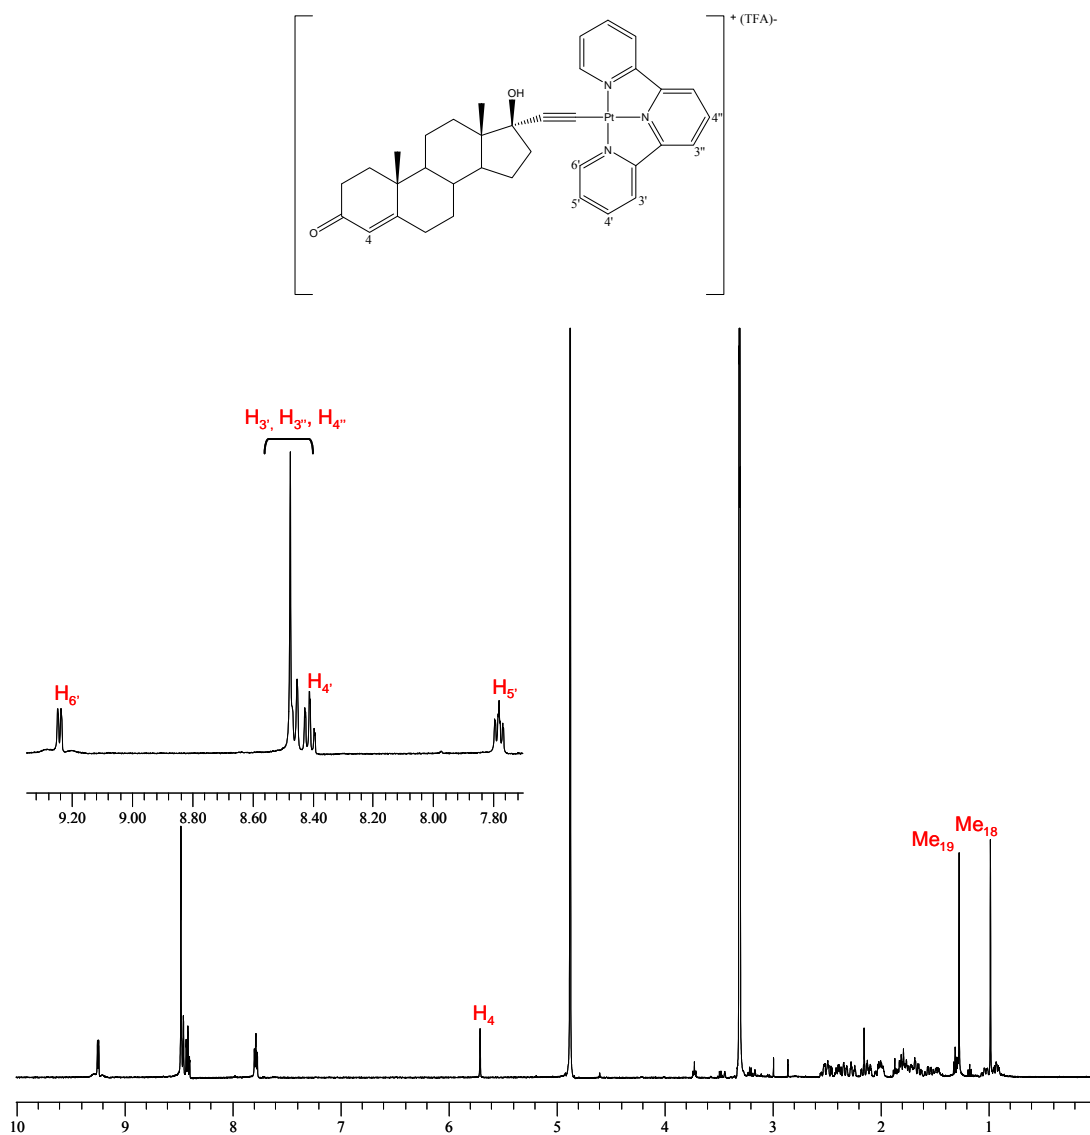

Figure 1.2.1.  $^1\text{H}$ -NMR of **2** in a mixture of deuterated water:acetonitrile (1:1).

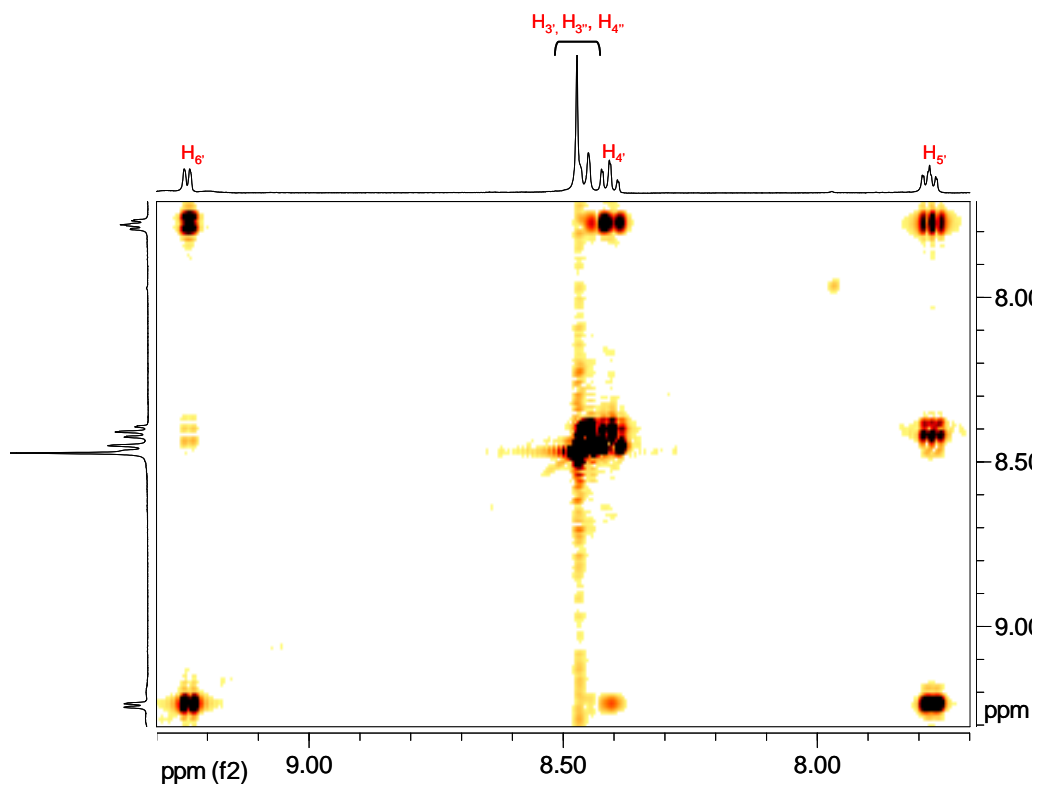

Figure 1.2.2. 2D-COSY  $^1\text{H}$ -NMR of **2** in a mixture of deuterated water:acetonitrile (1:1).

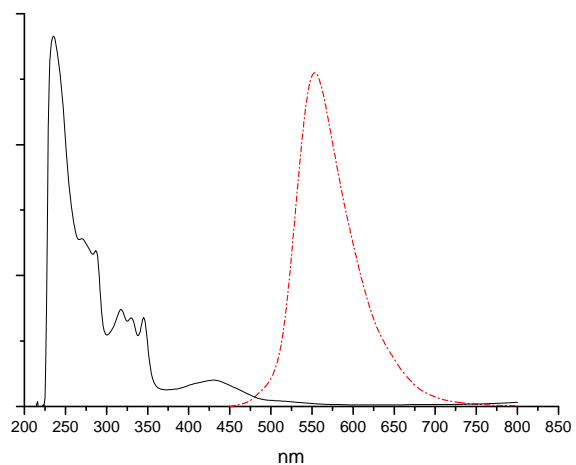

Figure 3.10. UV/Vis and Emission spectra of **2** (25  $\mu\text{M}$ ) in dichloromethane.  $\lambda_{\text{exc}}=425\text{nm}$ .

1.3. 3

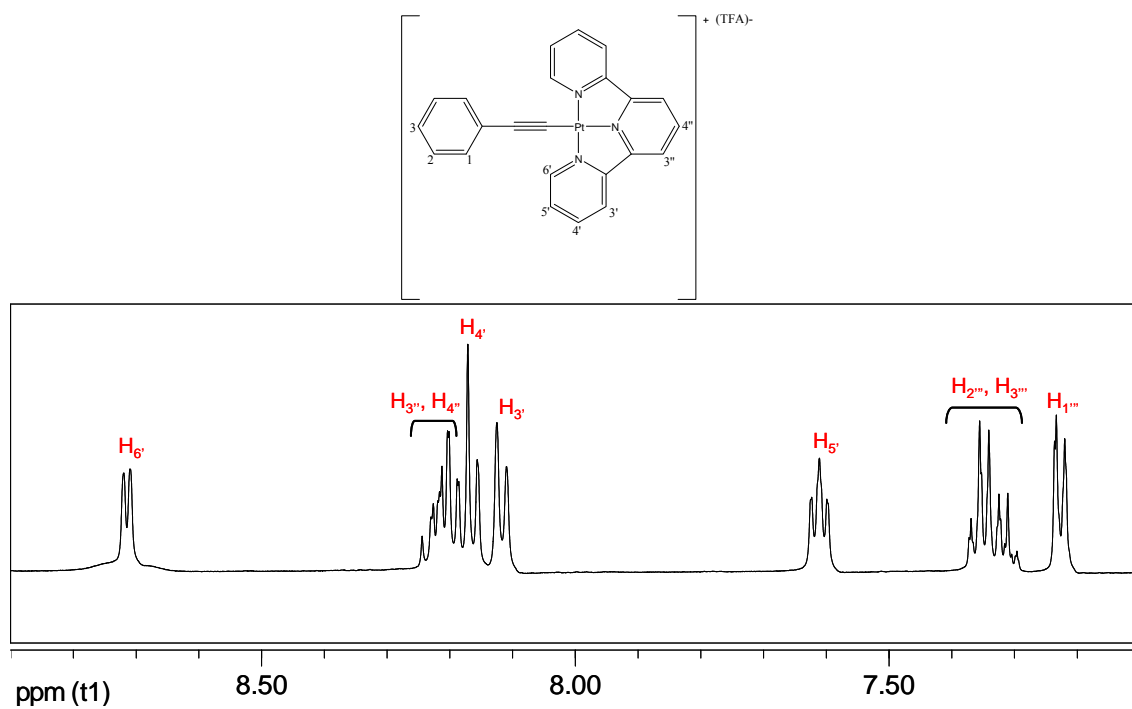

Figure 1.3.1. <sup>1</sup>H-NMR of **3** in a mixture of deuterated water:acetonitrile (1:1).

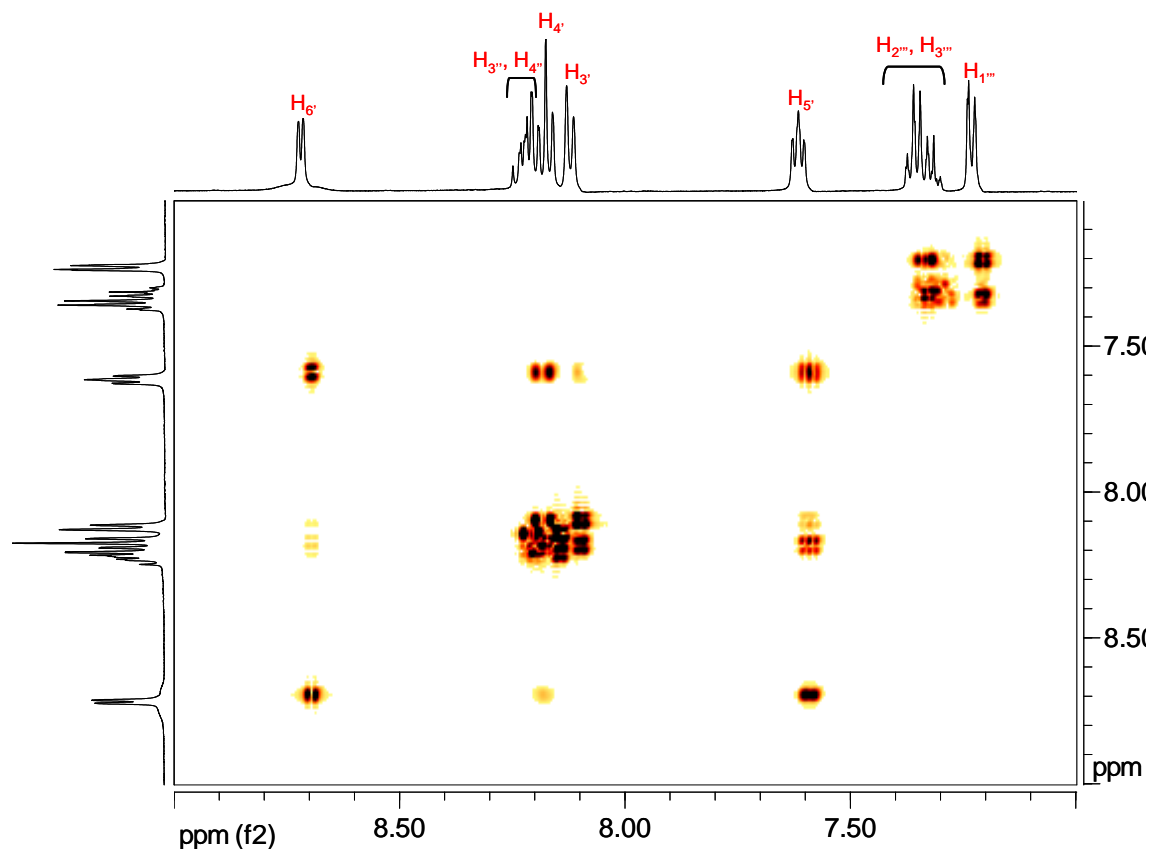

Figure 1.3.2. 2D-COSY <sup>1</sup>H-NMR of **3** in a mixture of deuterated water:acetonitrile (1:1).

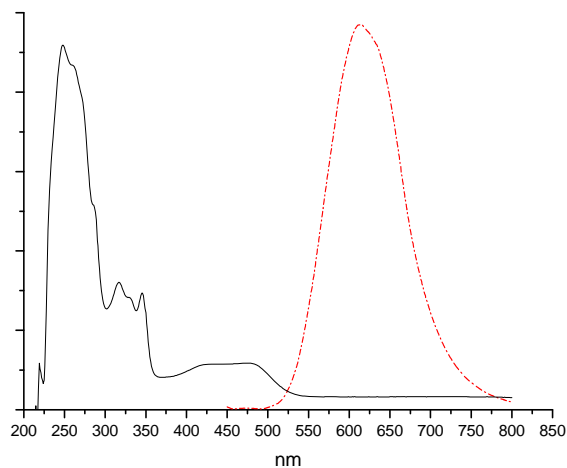

Figure 1.3.3. UV/Vis and Emission spectra of **3** (25  $\mu$ M) in dichloromethane.  $\lambda_{exc}=480$ nm..

1.4 4:

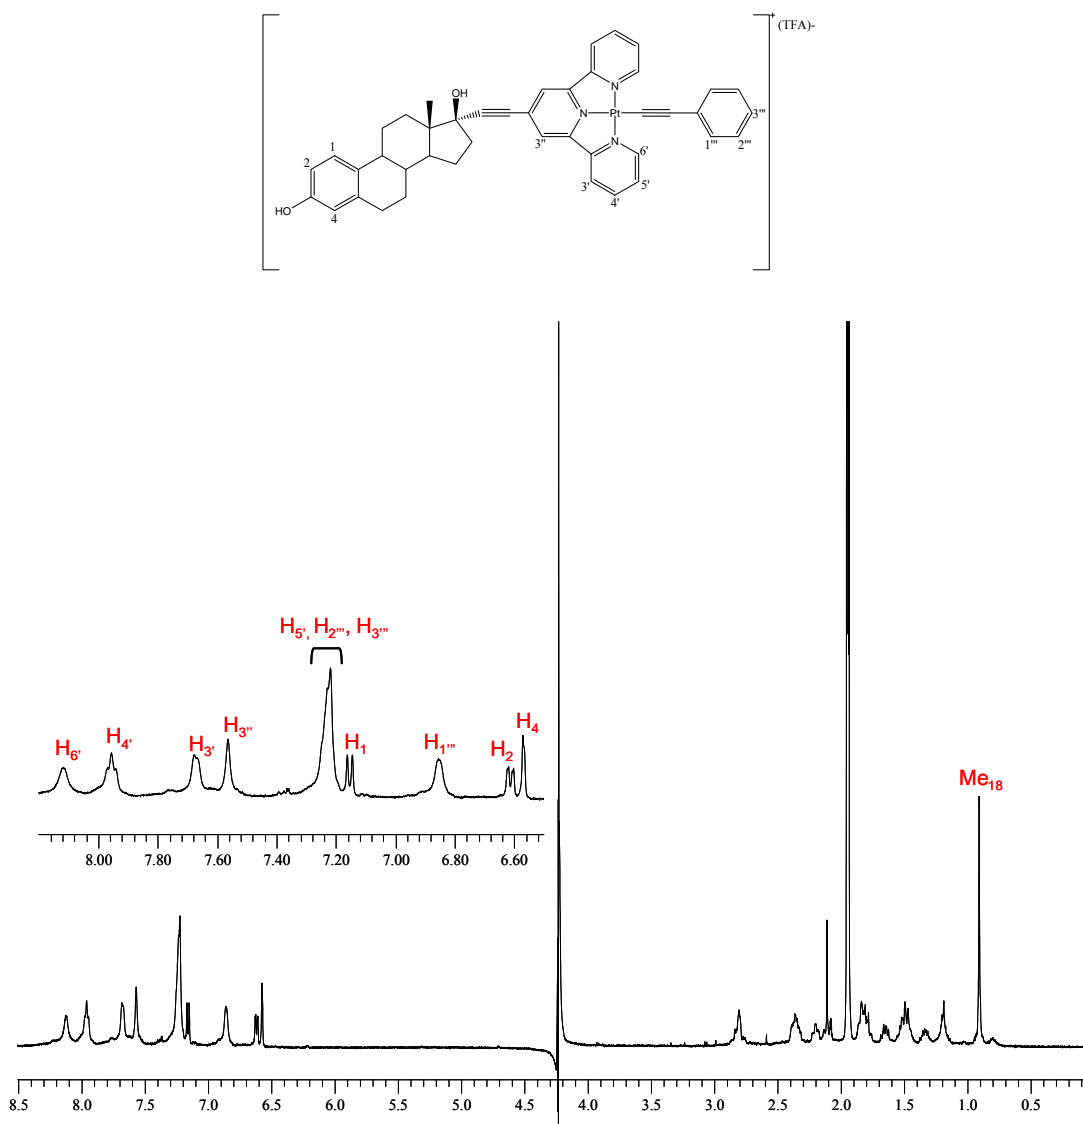

Figure 1.4.1.  $^1\text{H-NMR}$  of **4** in a mixture of deuterated water:acetonitrile (1:1).

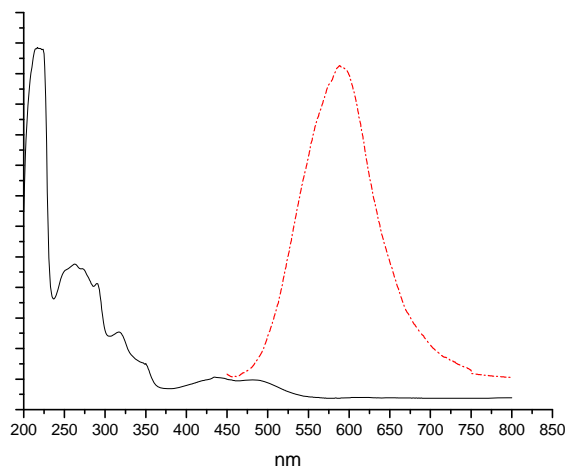

Figure 1.4.2. UV/Vis and Emission spectra of **4** (25  $\mu$ M) in dichloromethane.  $\lambda_{\text{exc}}=480\text{nm}$ .

1.5 5:

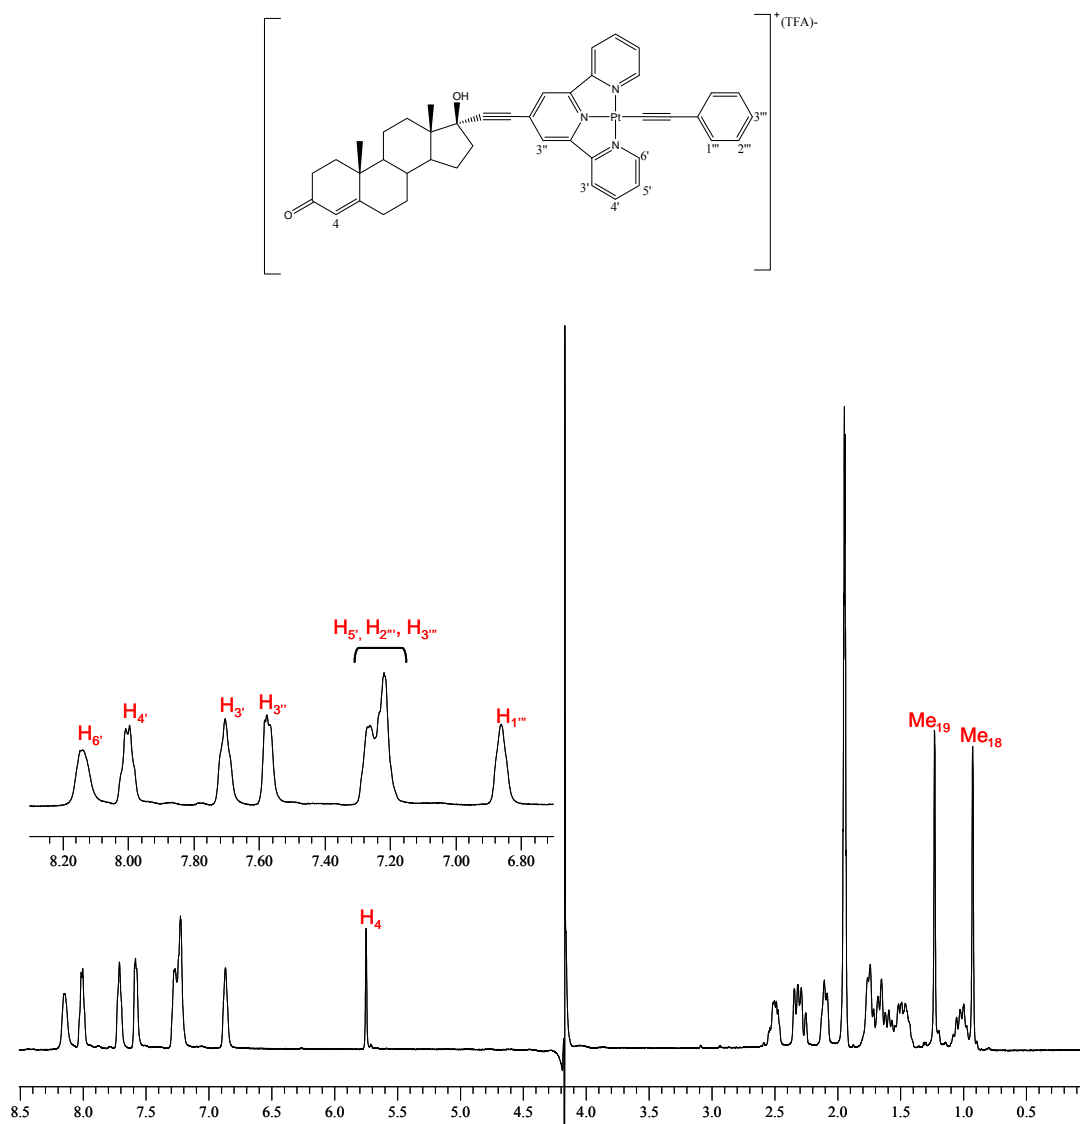

Figure 1.5.1.  $^1\text{H-NMR}$  of **5** in a mixture of deuterated water:acetonitrile (1:1).

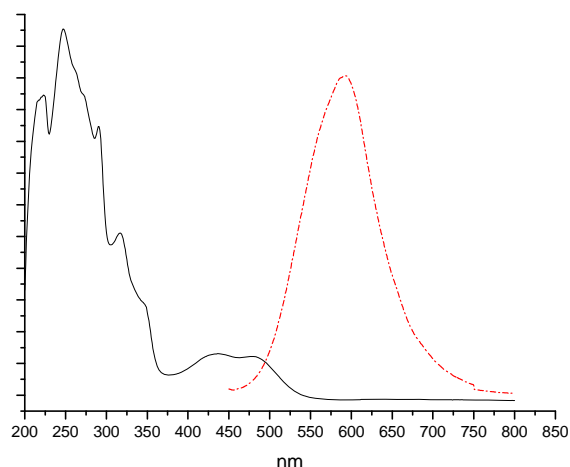

Figure 1.5.2. UV/Vis and Emission spectra of **5** (25  $\mu\text{M}$ ) in dichloromethane.  $\lambda_{\text{exc}}=480\text{nm}$ .

## 2. Cytotoxicity

**Table 2.1.** IC<sub>50</sub>  $\mu\text{M}$  of synthesised complexes against Breast and ovarian cancer cell lines.

| Molecule         | T-47D          | MDA-MB-231     | SK-OV-3        | A2780         | A2780cisR      | Rx <sup>[a]</sup> |
|------------------|----------------|----------------|----------------|---------------|----------------|-------------------|
| <b>1</b>         | 15.4 $\pm$ 0.1 | 6.3 $\pm$ 1    | 19.3 $\pm$ 1.2 | 2.6 $\pm$ 0.7 | 5.9 $\pm$ 0.9  | 2.2               |
| <b>2</b>         | 12.3 $\pm$ 1.9 | 11.4 $\pm$ 1.2 | 19.8 $\pm$ 2.6 | 4.3 $\pm$ 0.9 | 11.8 $\pm$ 1.8 | 2.8               |
| <b>3</b>         | 2.1 $\pm$ 1.5  | 4 $\pm$ 1.4    | 15.5 $\pm$ 0.4 |               |                |                   |
| <b>4</b>         | 52.2 $\pm$ 2.6 | 50.1 $\pm$ 5.9 | 83.8 $\pm$ 4.2 |               |                |                   |
| <b>5</b>         | 22.2 $\pm$ 2.9 | 30.5 $\pm$ 7.8 | 39.4 $\pm$ 9.1 |               |                |                   |
| <b>Cisplatin</b> | 28 $\pm$ 3     | 31.3 $\pm$ 4.7 | 11.2 $\pm$ 0.1 | 3.0 $\pm$ 0.5 | 12.8 $\pm$ 1.4 | 4.3               |

[a] Rx is ratio of IC<sub>50</sub> for a compound in A2780cisR compared to A2780. \* indicate a oestradiol derivative.

## 3. Cellular uptake

|                  | SK-OV-3      |              |               | T-47D        |             |               | MDA-MB-231   |             |              |
|------------------|--------------|--------------|---------------|--------------|-------------|---------------|--------------|-------------|--------------|
|                  | whole cell   | cytoplasm    | nuclei        | whole cell   | cytoplasm   | nuclei        | whole cell   | cytoplasm   | nuclei       |
| <b>1</b>         | 159 $\pm$ 14 | 111 $\pm$ 11 | 41 $\pm$ 5    | 130          | 80 $\pm$ 19 | 30 $\pm$ 1    | 361 $\pm$ 23 | 61 $\pm$ 13 | 33 $\pm$ 14  |
| <b>2</b>         | 474 $\pm$ 7  | 97 $\pm$ 8   | 28 $\pm$ 2    | 408 $\pm$ 26 | 53 $\pm$ 12 | 17 $\pm$ 1    | 287 $\pm$ 11 | 67 $\pm$ 5  | 26 $\pm$ 1   |
| <b>3</b>         | 749          | 137 $\pm$ 7  | 129           | 204 $\pm$ 21 | 77          | 101 $\pm$ 0.3 | 630 $\pm$ 53 | 160 $\pm$ 6 | 160 $\pm$ 11 |
| <b>Cisplatin</b> | 25 $\pm$ 12  | 12 $\pm$ 2   | 1.4 $\pm$ 0.4 | 11 $\pm$ 2   | 5           | 0.2           | 9 $\pm$ 0.1  | 8 $\pm$ 1.6 | 2 $\pm$ 0.1  |

Table 3.1 pmoles of Pt in T-47D, SK-OV-3 and MDA-MB-231 per million cells after 3 hours of treatment with 30  $\mu\text{M}$  of complexes.

#### 4. Stability of complexes

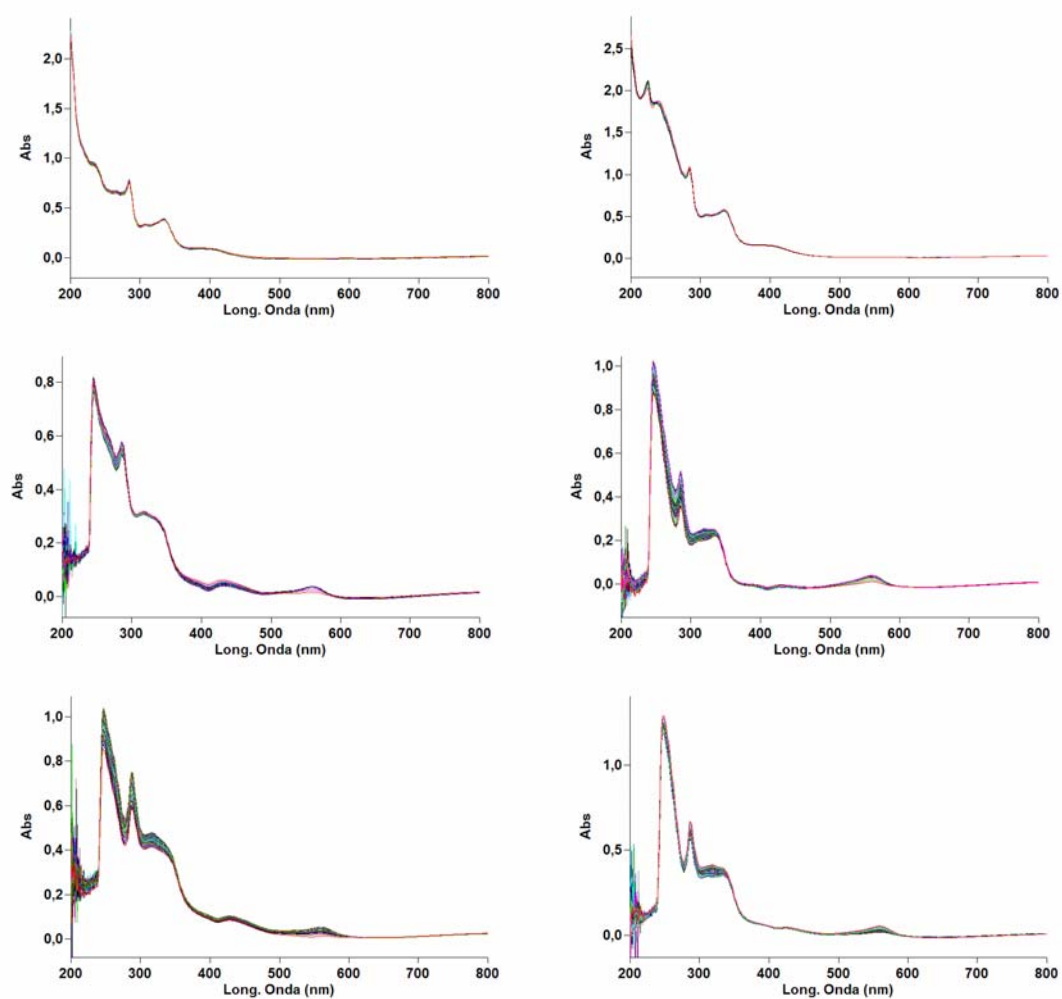

Figure 4.1. UV/Vis of **1** (left) and **2** (right) (50  $\mu$ M) during 72h in water (top), RPMI 1640 (middle) and DMEM medium (bottom).

## 5 Ethidium bromide displacement

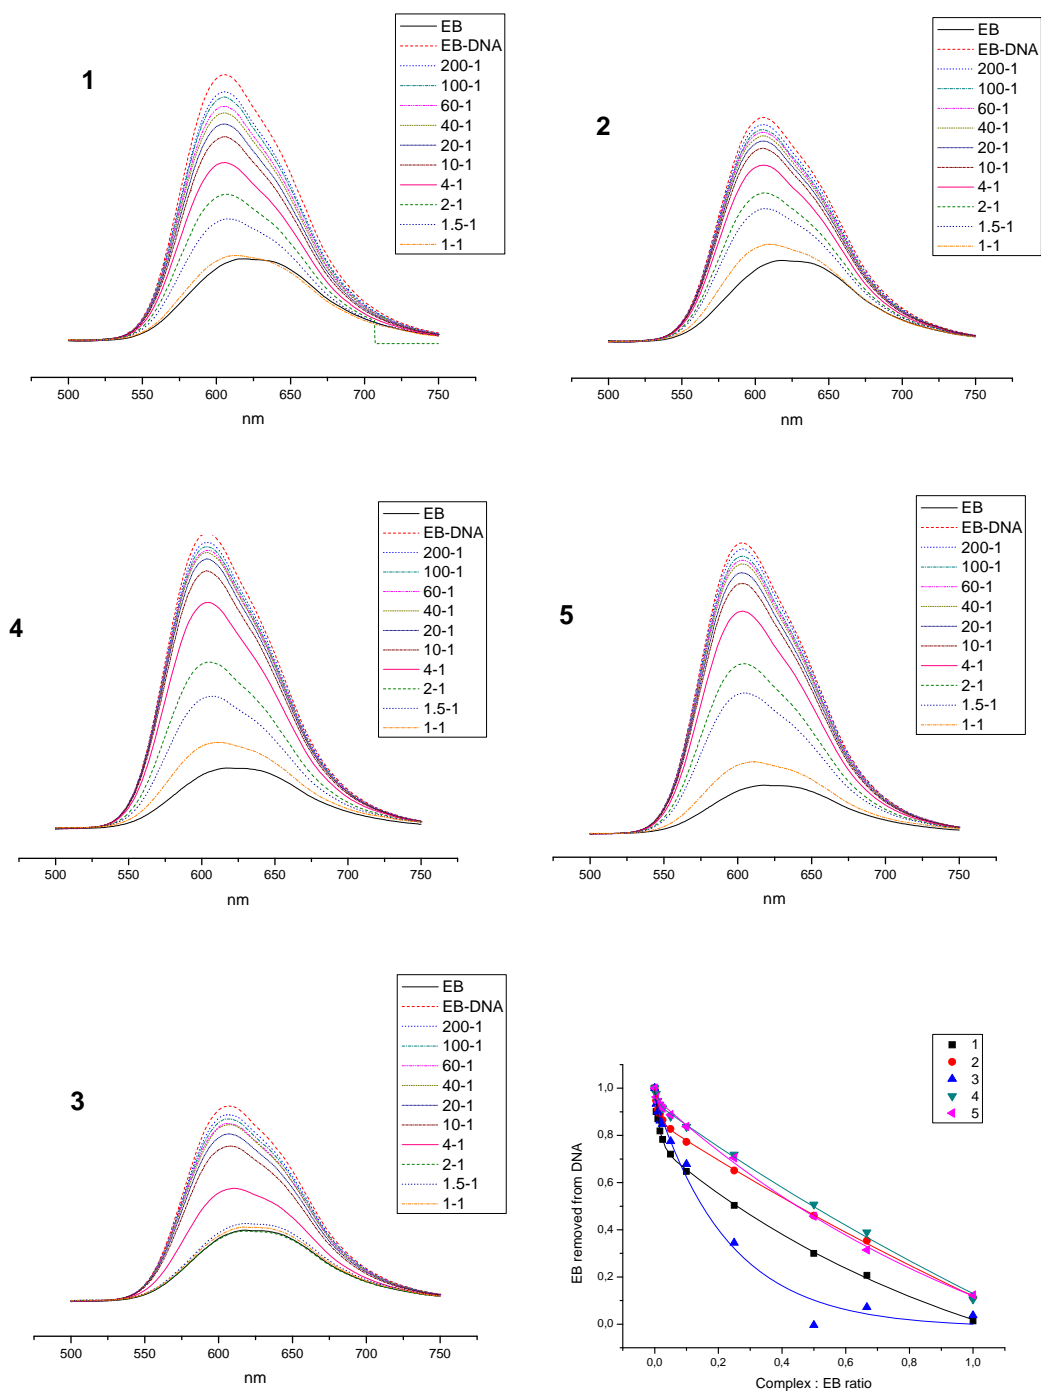

Figure 5.1. Displacement of ethidium bromide (15  $\mu$ M) from ct-DNA (12  $\mu$ M) by synthesized complexes. Mixing ratios EB/complex are shown in the caption.  $\lambda_{exc}$ =480nm. Decreasing ratios of emission (bottom right).

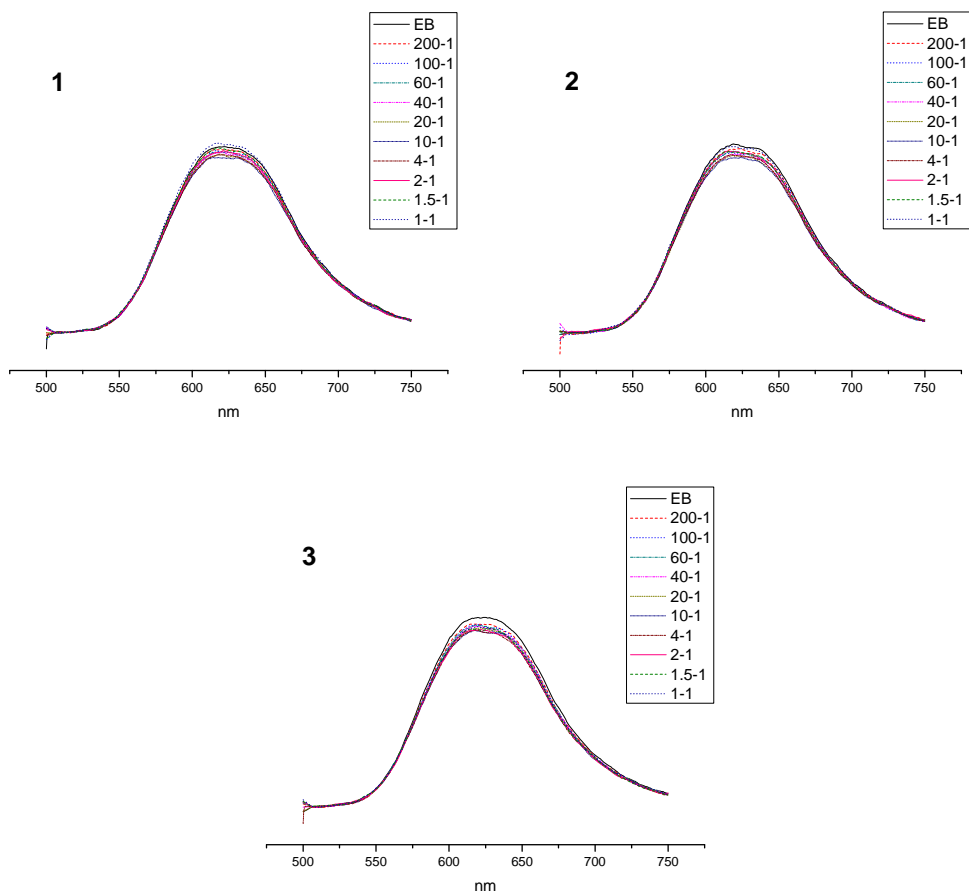

Figure 5.2. Effect on free ethidium bromide (15  $\mu$ M) fluorescence by synthesized complexes. Mixing ratios EB/complex are shown in the caption.  $\lambda_{exc}$ =480nm. Decreasing ratios of emission (bottom right).
